# Supplementary material for: Aberrant expression of the COX2/PGE2 axis is induced by activation of the RAF/MEK/ERK pathway in BRAFV595E canine urothelial carcinoma
Source: PubMed Central journal article supplement (PMC7210937; doi:10.1038/s41598-020-64832-5), 2020-05-08
Supplement: 41598_2020_64832_MOESM1_ESM.pdf [file 41598_2020_64832_MOESM1_ESM.pdf]

**Aberrant expression of the COX2/PGE<sub>2</sub> axis is induced by activation of the RAF/MEK/ERK pathway in BRAF<sup>V595E</sup> canine urothelial carcinoma**

Ryohei Yoshitake <sup>a</sup>, Kohei Saeki <sup>a,\*</sup>, Shotaro Eto <sup>a</sup>, Masahiro Shinada <sup>a</sup>, Rei Nakano <sup>b</sup>, Hiroshi Sugiya <sup>b</sup>, Yoshifumi Endo <sup>a</sup>, Naoki Fujita <sup>a</sup>, Ryohei Nishimura <sup>a</sup>, Takayuki Nakagawa <sup>a</sup>

<sup>a</sup> *Laboratory of Veterinary Surgery, Graduate School of Agricultural and Life Sciences, University of Tokyo, 1-1-1, Yayoi, Bunkyo-ku, Tokyo 113-8657, Japan*

<sup>b</sup> *Laboratory of Veterinary Biochemistry, Department of Veterinary Medicine, Nihon University College of Bioresource Sciences, 1866 Kameino, Fujisawa, Kanagawa, 252-0880, Japan*

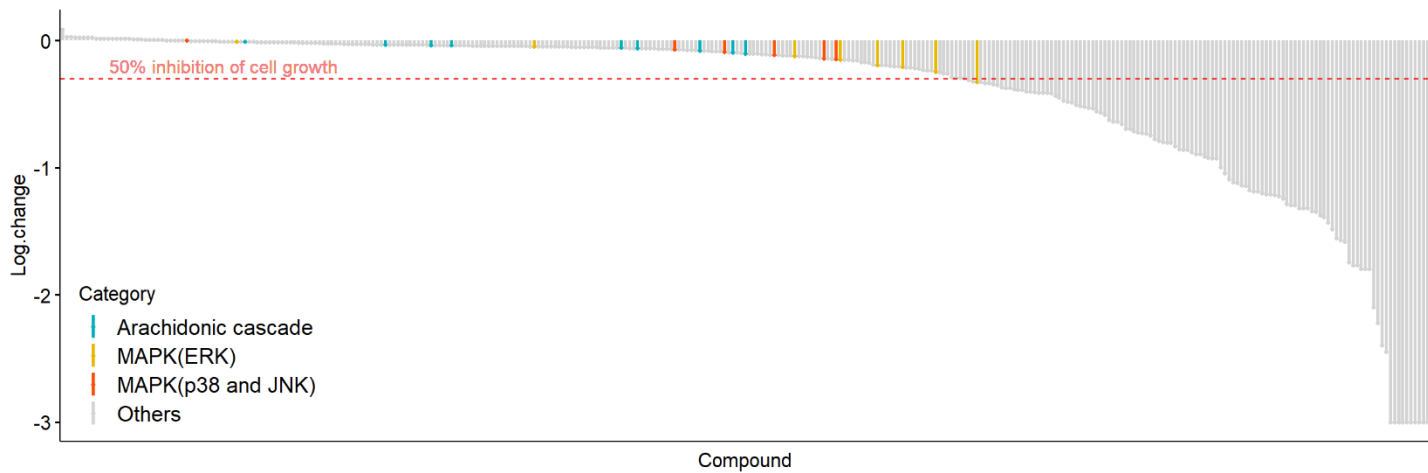

**Supplementary Figure S1.** Cell growth in cUC cells (Sora) during drug screening. Y axis represents log<sub>10</sub> values of changes in cell density for each inhibitor (n = 331). The drugs which belong to selected pathways are coloured as indicated.

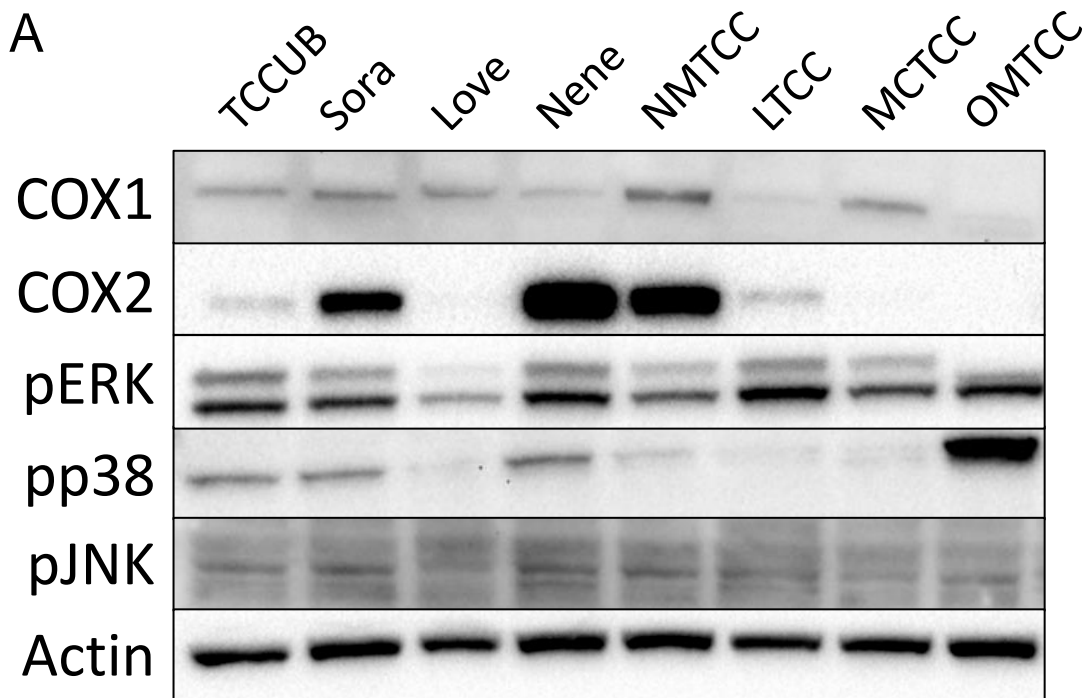

**B** PGE<sub>2</sub> concentration in medium

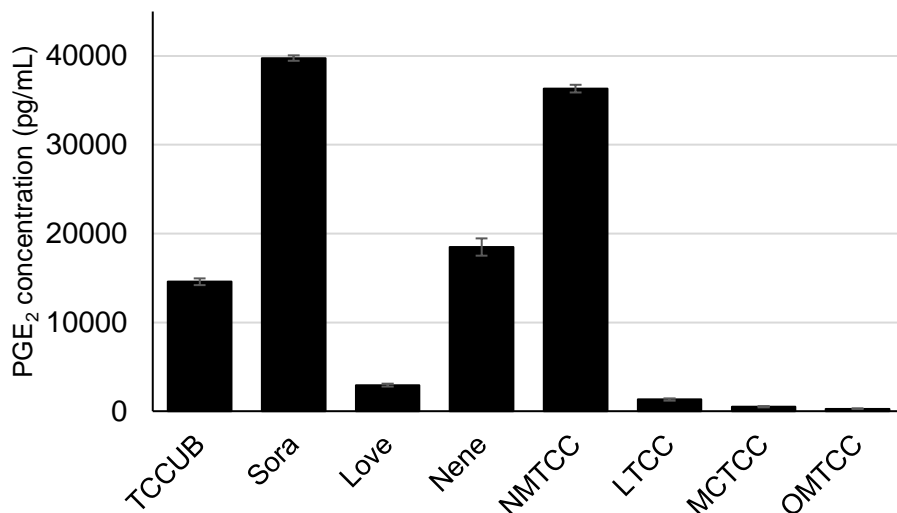

**Supplementary Figure S2.** Characteristics of the cUC cell lines used in this study. (A) Basal expression of the proteins associated with PG production and MAPK pathways. (B) Basal PGE<sub>2</sub> production. cUC cell lines (TCCUB, Sora, Love, Nene, NMTCC, LTCC, MCTCC and OMTCC) were seeded in serum free medium and incubated for 24 h. After 24 h serum starvation, cUC cells were treated with final concentration of 10% foetal bovine serum and incubated for further 24 h. Protein levels in whole cell lysate were detected by Western blotting with Actin as loading control. PGE<sub>2</sub> concentration in culture supernatant was measured using enzyme-linked immunosorbent assay. Data are presented as mean  $\pm$  SD of three experiments.

A

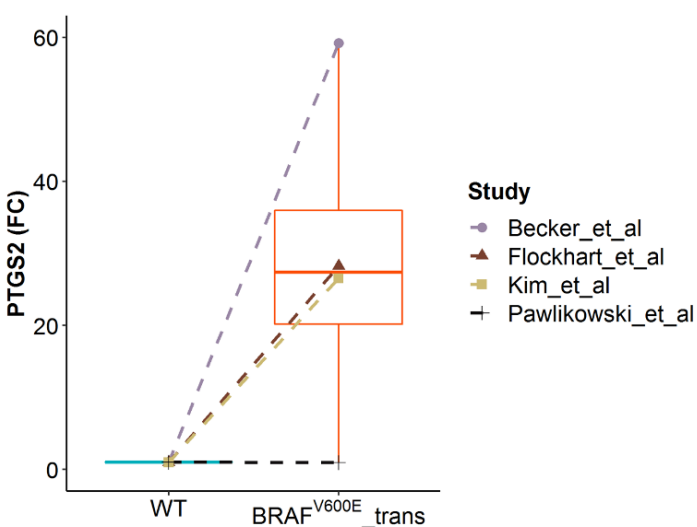

B

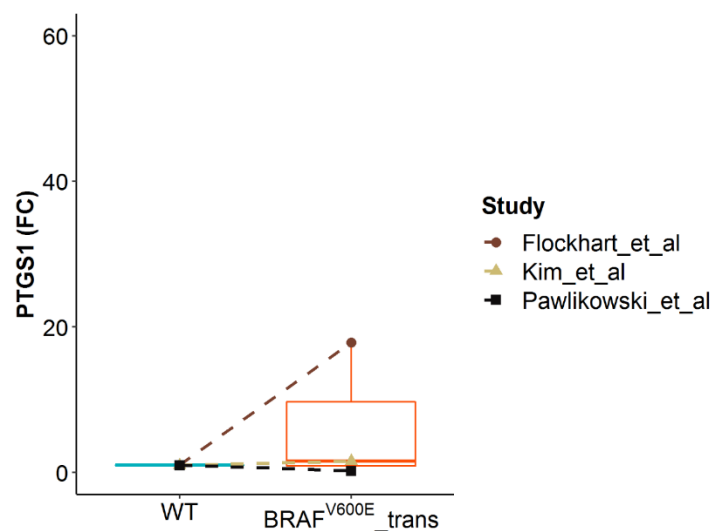

**Supplementary Figure S3.** Change in (A) *PTGS2* and (B) *PTGS1* expression by mutant *BRAF* transfection. Data was obtained from four studies in public databases (PubMed and GREIN). Y axis represents the fold change (FC) of the gene expression value of the *BRAF*<sup>V600E</sup> transfected cells (BRAF<sup>V600E</sup>\_trans; red) normalised by that of the parental cells (WT; blue).

A

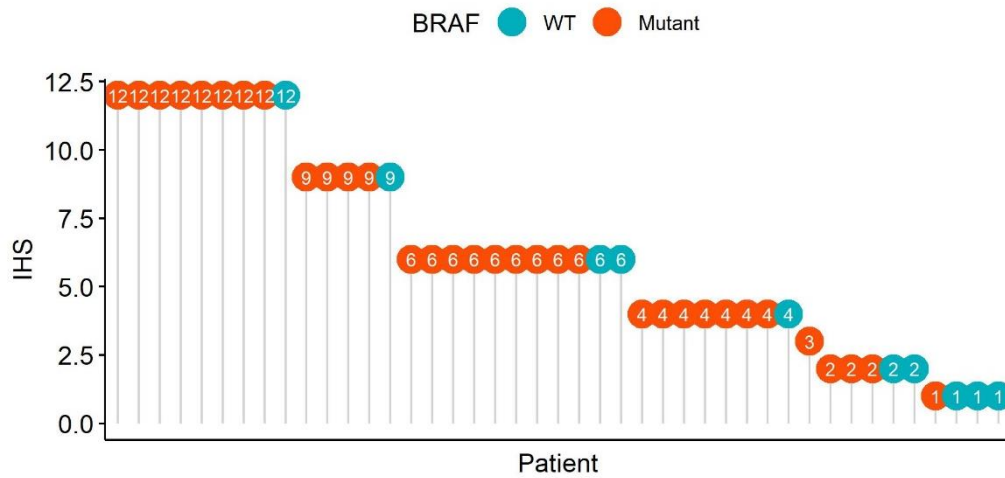

B

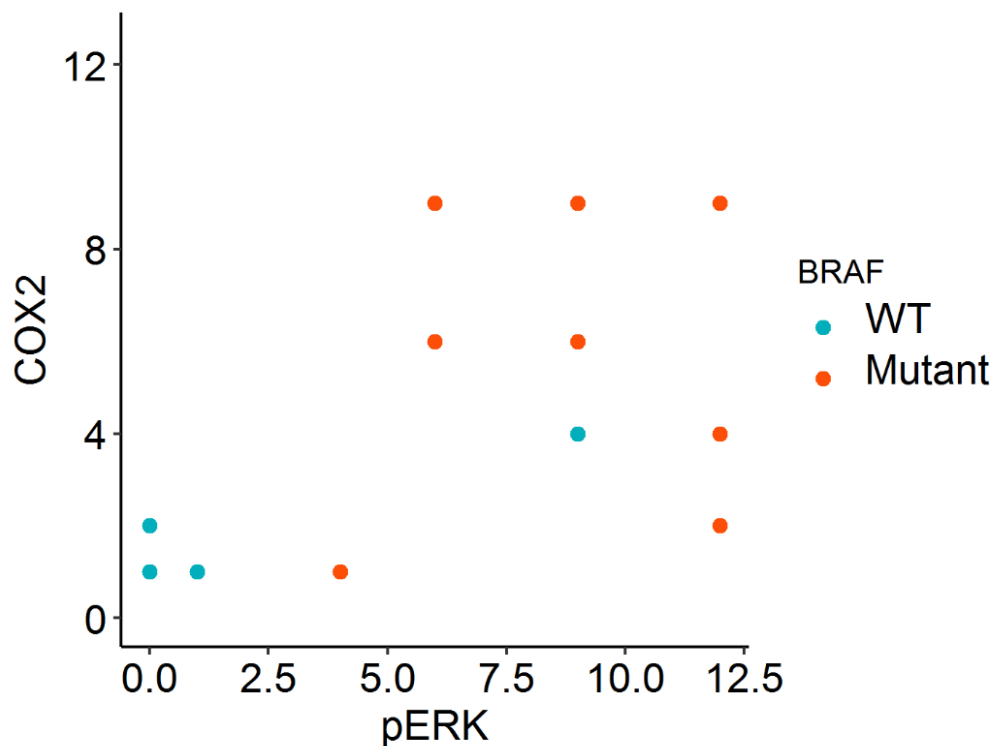

**Supplementary Figure S4.** (A) Breakdown of *BRAF* genotype and immunohistochemical score (IHS) for COX2 in individual patients. Y axis represents IHS in each patient with wild-type *BRAF* (WT; blue) and mutant *BRAF*<sup>V595E</sup> (Mutant; red). (B) Relationship of COX2 IHS with *BRAF* genotype and pERK. X axis and Y axis represent the IHS in each patient for pERK and COX2, respectively. Colour represents the *BRAF* genotype as described above. IHS for COX2 and pERK was determined by a semi-quantitative method as described in Materials and Methods.

**A****0 h**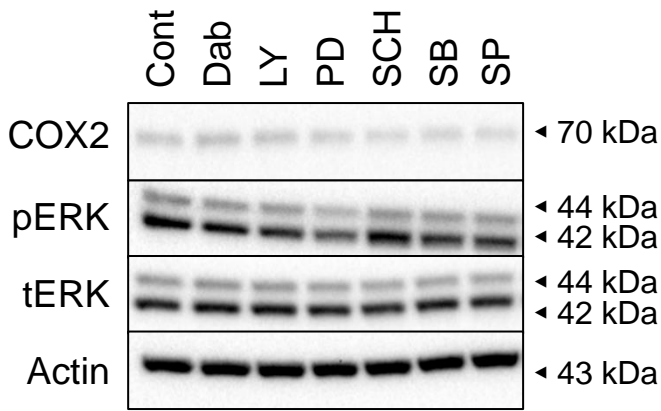**PGE<sub>2</sub>**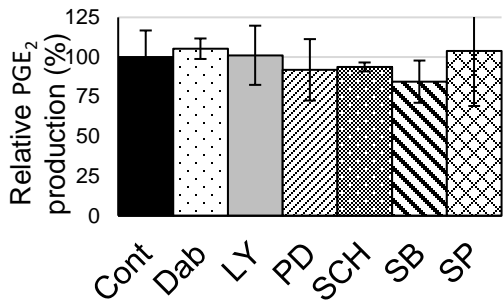**6 h**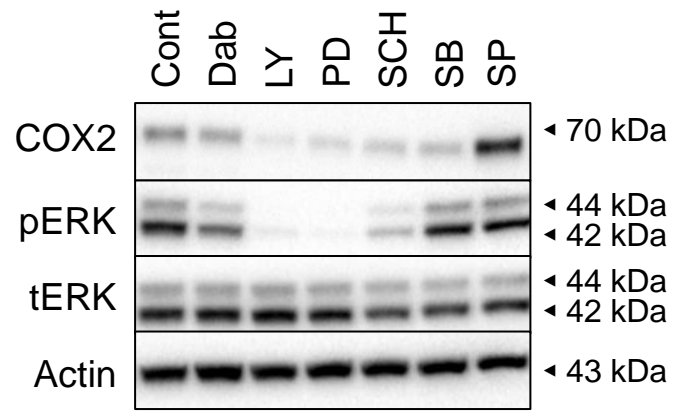**PGE<sub>2</sub>**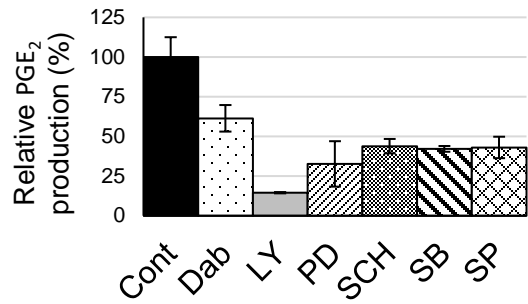**12 h**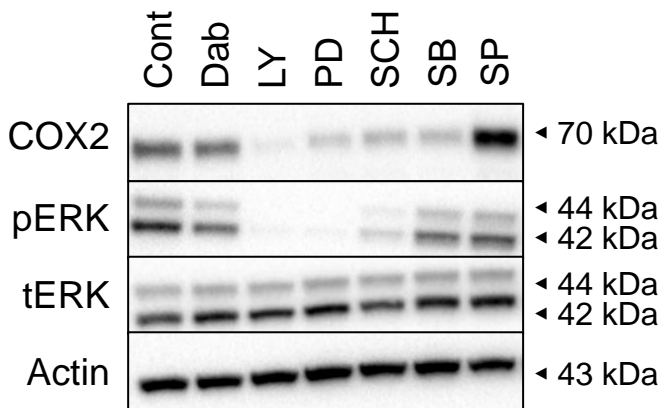**PGE<sub>2</sub>**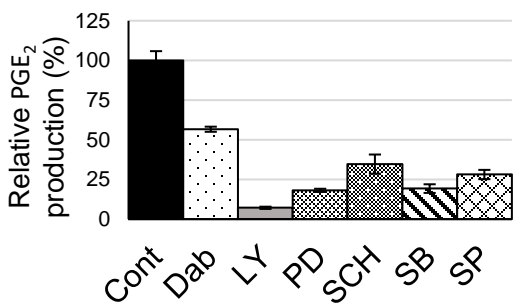**24 h**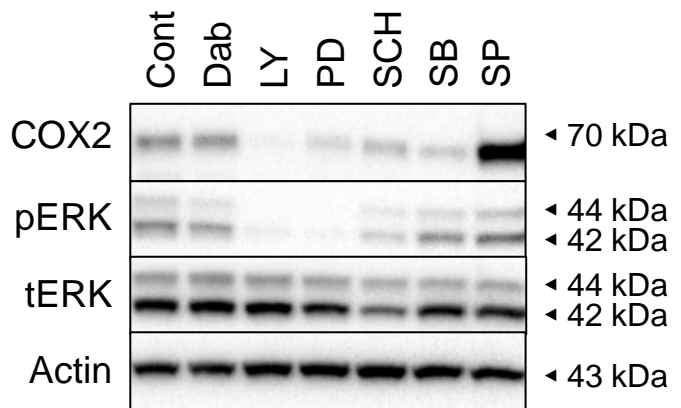**PGE<sub>2</sub>**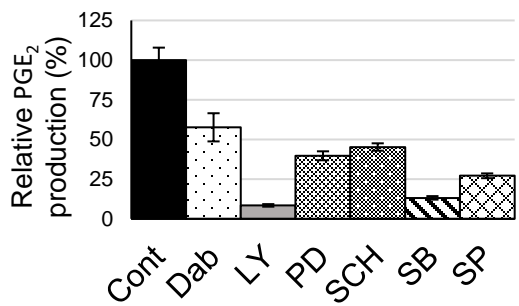

B

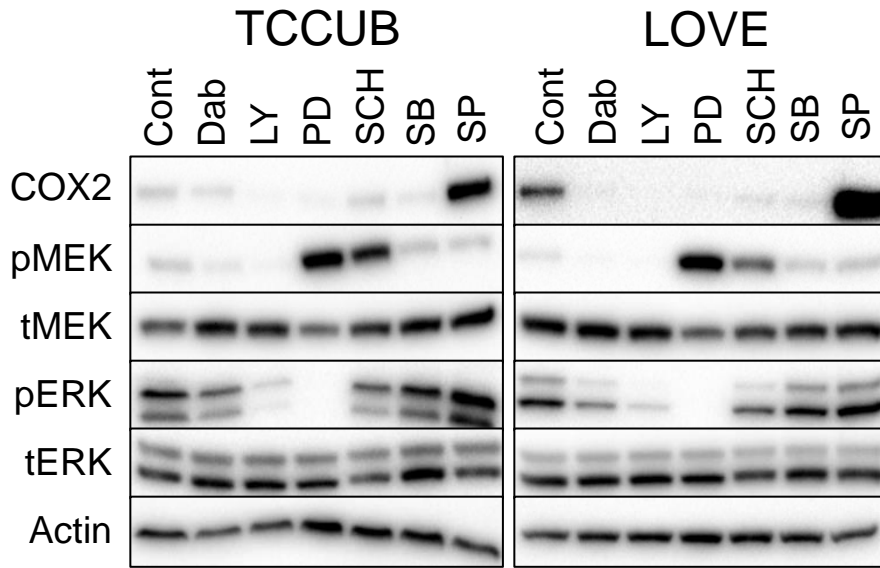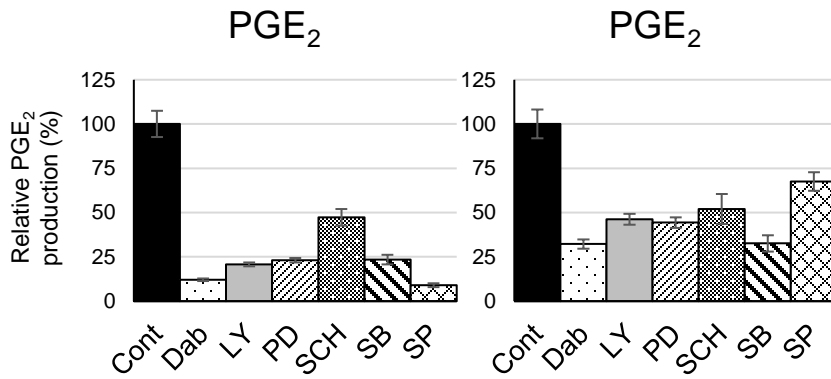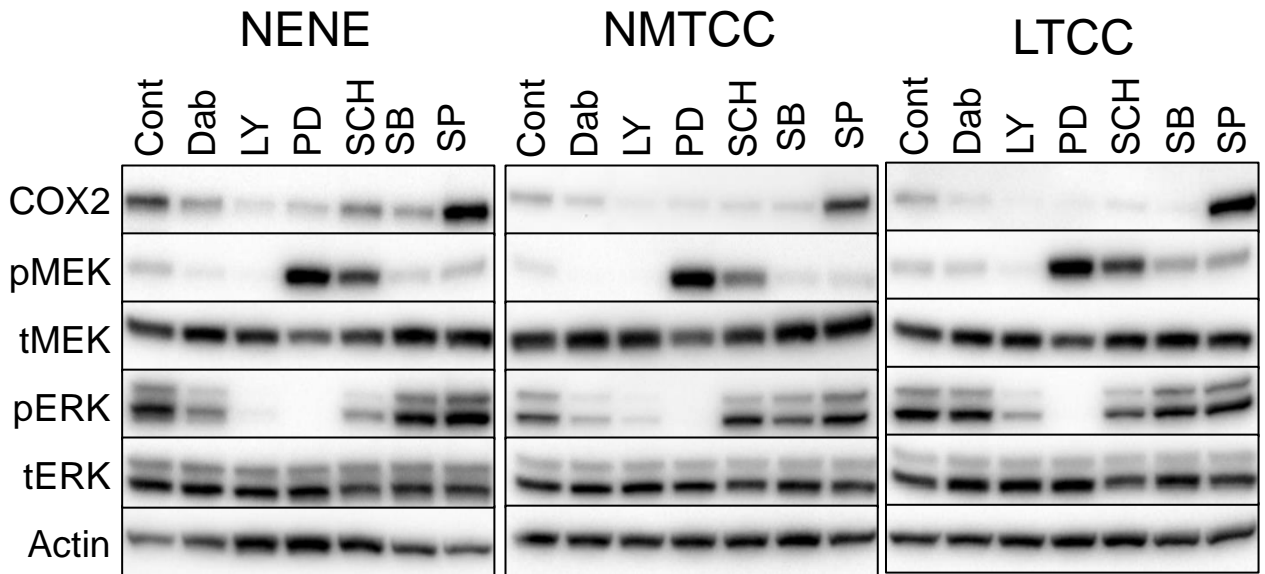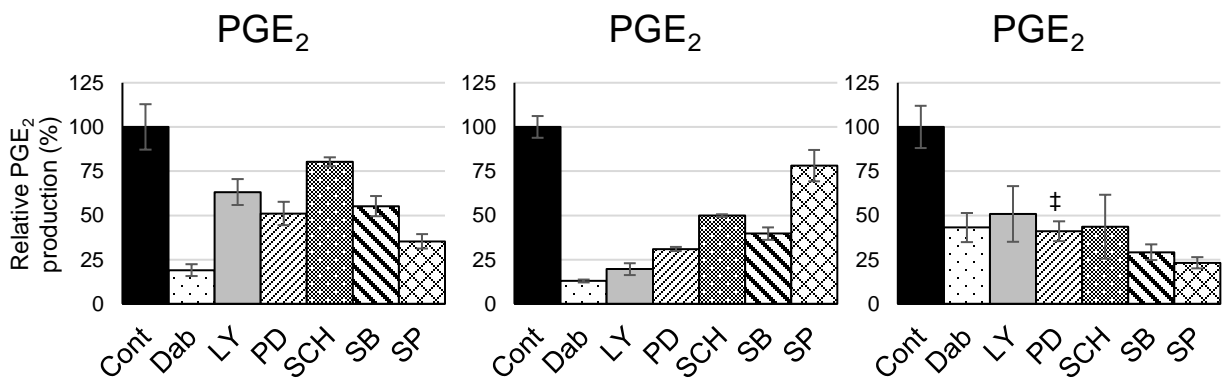

## B (cont'd)

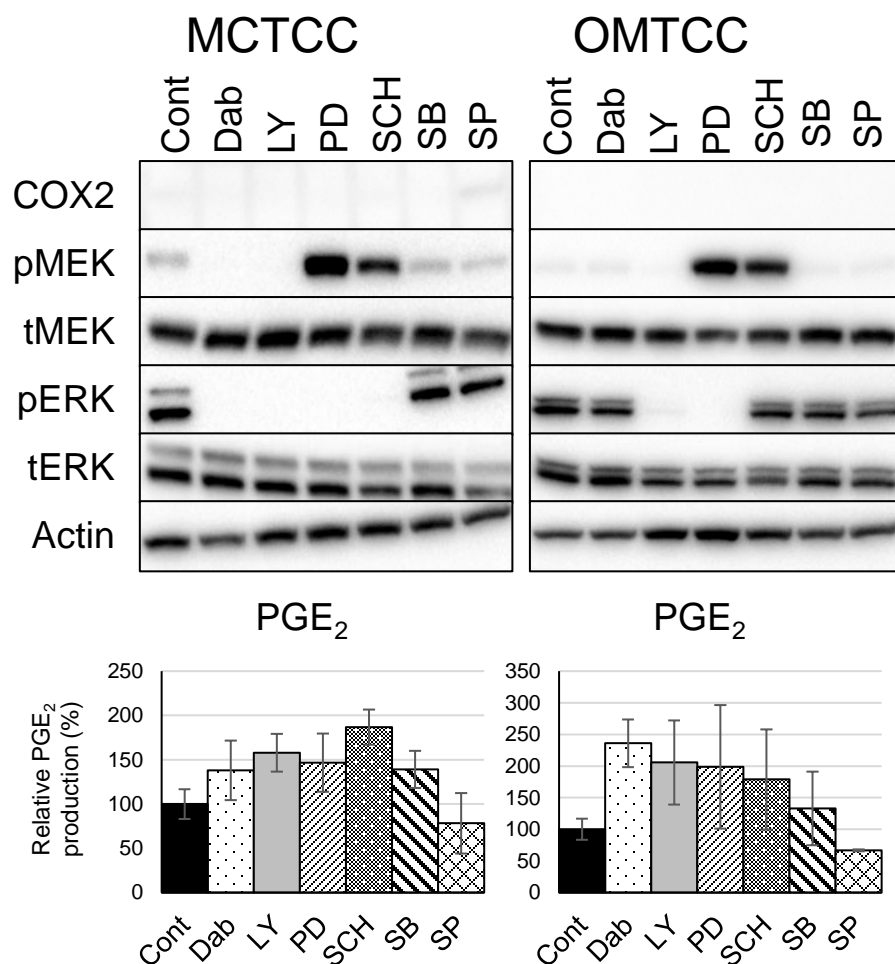

**Supplementary Fig. S5.** Effect of p38 and JNK pathway inhibition on COX2 expression and PGE<sub>2</sub> production. Protein levels in whole cell lysate were detected by Western blotting with Actin as loading control. Amount of PGE<sub>2</sub> in culture medium were measured by enzyme linked immunosorbent assay and corrected to cell number. Bar graph represents % control of PGE<sub>2</sub> production. (A) Whole image of the membrane and PGE<sub>2</sub> production shown in Figure. 2A. cUC cells (Sora) were treated with vehicle (dimethyl sulfoxide; Cont) and inhibitors of BRAF (Dabrafenib; Dab), pan-RAF (LY3009120; LY), MEK (PD0325901; PD), ERK (SCH772984; SCH), p38 (SB239063; SB) and JNK (SP600125; SP) at 1  $\mu$ M for indicated time. (B) Whole image of the membrane and PGE<sub>2</sub> production shown in Figure. 2C. The seven cUC cell lines (TCCUB, Love, Nene, NMTCC, LTCC, MCTCC and OMTCC) were treated with vehicle (Cont), Dabrafenib (Dab) at 10  $\mu$ M, LY3009120 (LY) at 1  $\mu$ M, PD0325901 (PD) at 10  $\mu$ M, SCH772984 (SCH) at 10  $\mu$ M, SB239068(SB) at 10  $\mu$ M and SP600125 (SP) at 10  $\mu$ M for 12 h. Data are presented as mean  $\pm$  SD of three experiments.



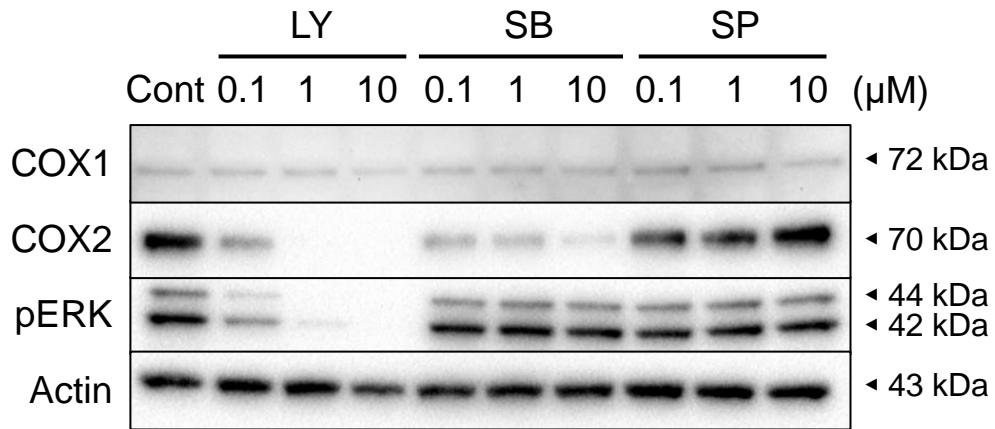

**Supplementary Figure S6.** Effect of ERK, p38 and JNK MAPK inhibition on COX1 and COX2 expression. Protein levels in whole cell lysates were detected by Western blotting with Actin as loading control. cUC cells (Sora) were treated with vehicle (dimethyl sulfoxide; Cont) and inhibitors of BRAF (Dabrafenib; Dab), pan-RAF (LY3009120; LY), MEK (PD0325901; PD) and ERK (SCH772984; SCH) for 12 h at indicated dose.

### COX1

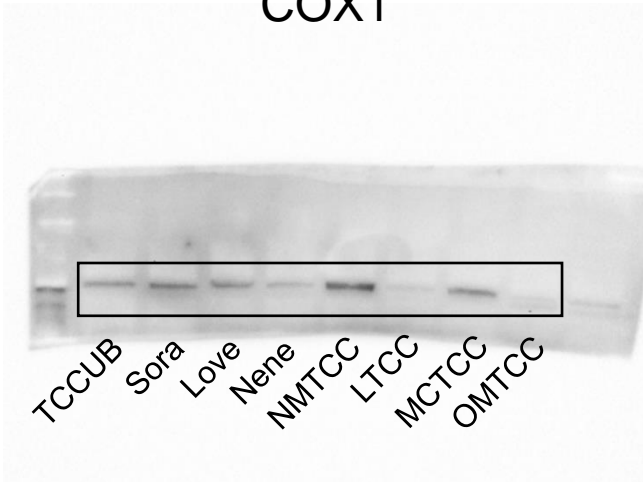

### COX2

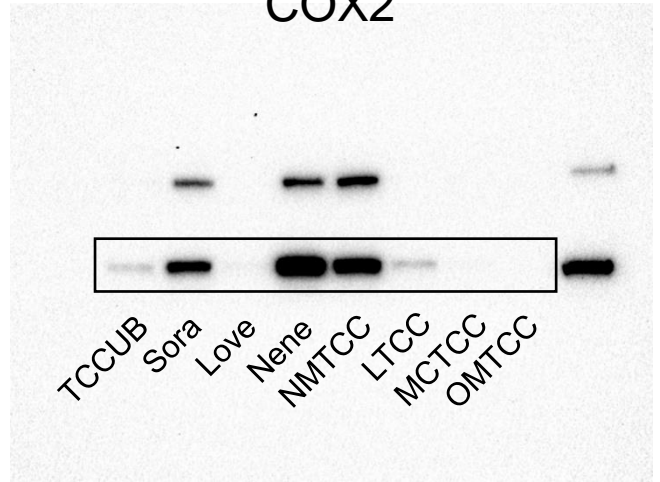

### pERK

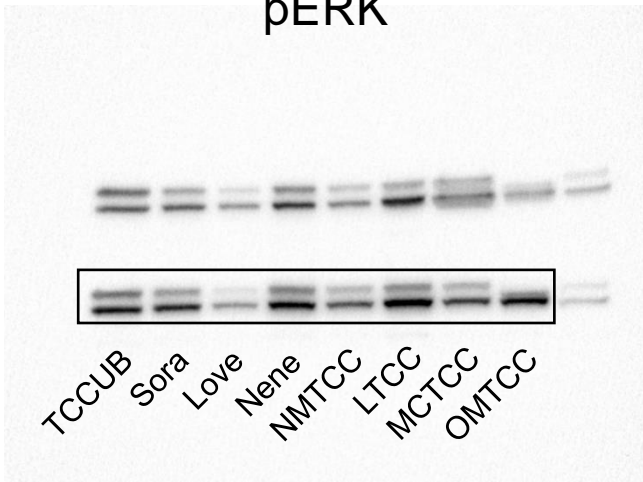

### pp38

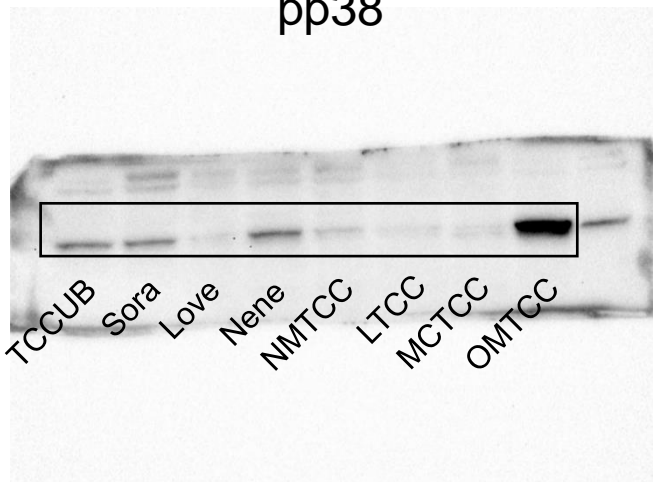

### pJNK

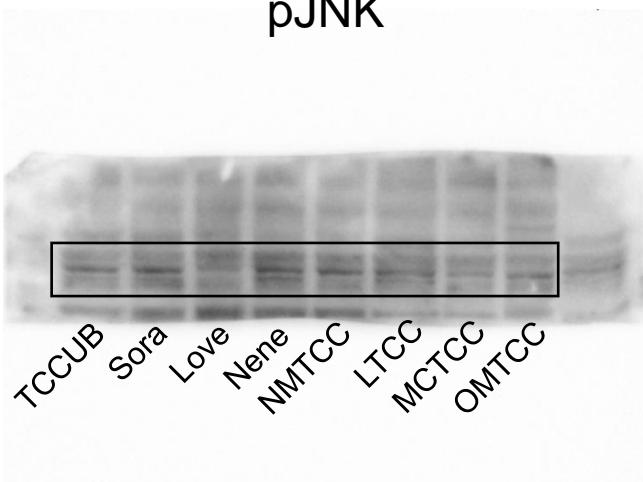

### Actin

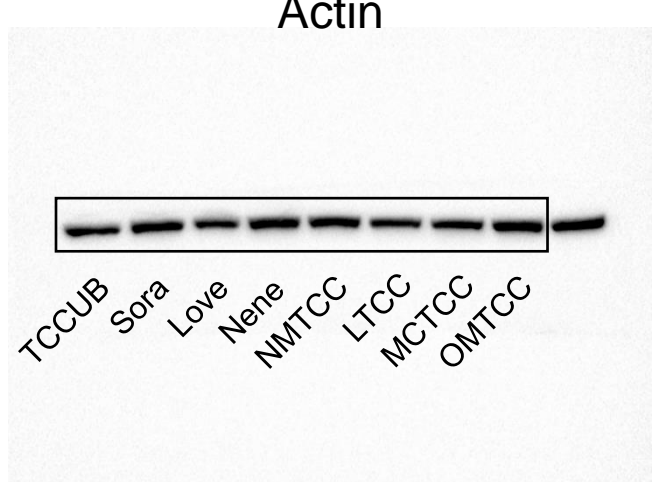

**Supplementary Figure S7.** Uncropped image of Western blots for Supplementary Figure S2A. cUC cell lines (Sora, TCCUB, Love, Nene, LTCC, MCTCC and OMTCC) were seeded in serum free medium and incubated for 24 h. After 24 h serum starvation, cUC cells were treated with final concentration of 10% foetal bovine serum and incubated for further 24 h.

## COX2

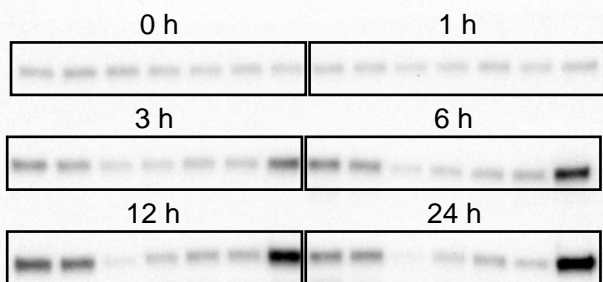

## Actin

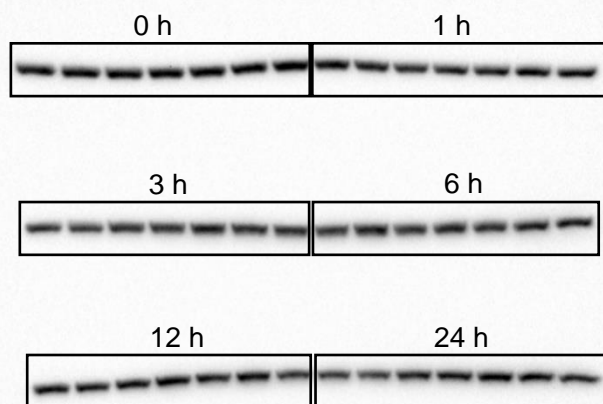

## pERK

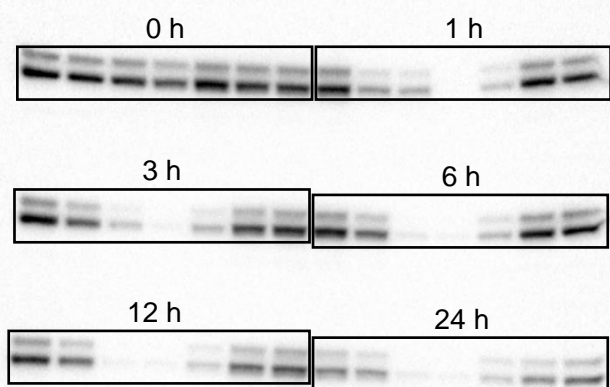

## tERK

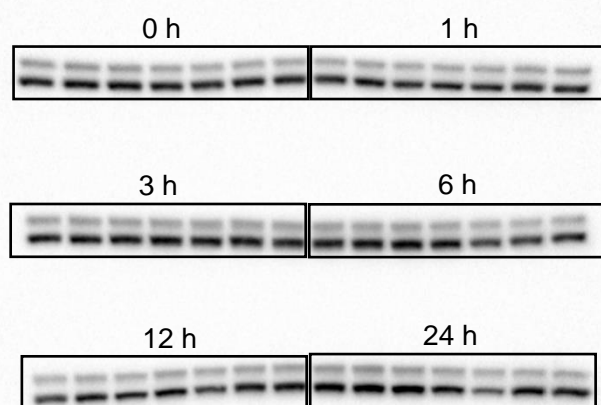

## pMEK

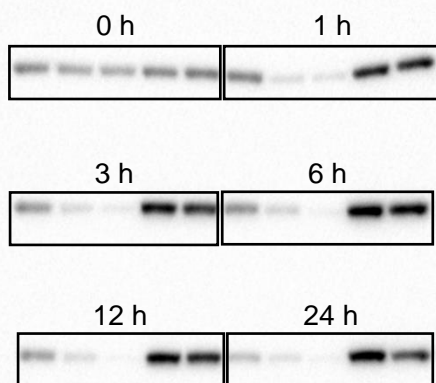

## tMEK

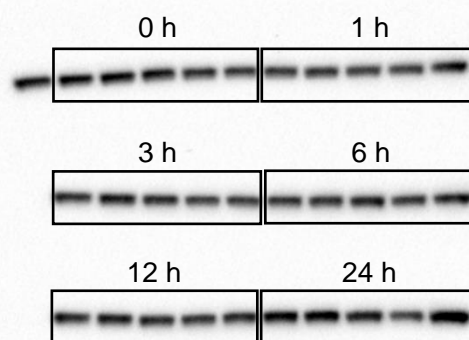

**Supplementary Figure S8.** Uncropped image of Western blots for Figure 2A and Supplementary Figure S5A. cUC cells (Sora) was treated with vehicle (dimethyl sulfoxide) and inhibitors of BRAF (Dabrafenib), pan-RAF (LY3009120), MEK (PD0325901), ERK (SCH772984), p38 (SB239063) and JNK (SP600125) at 1  $\mu$ M for indicated time.

## COX2

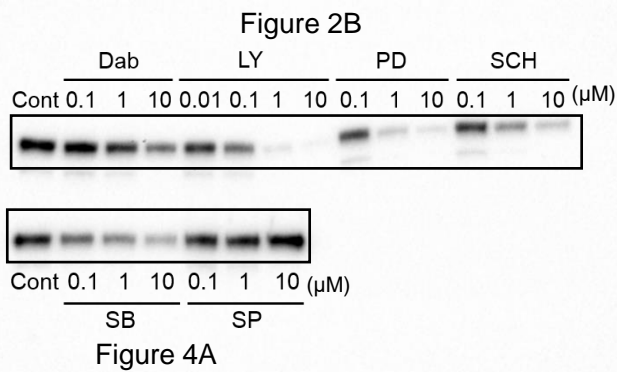

## Actin

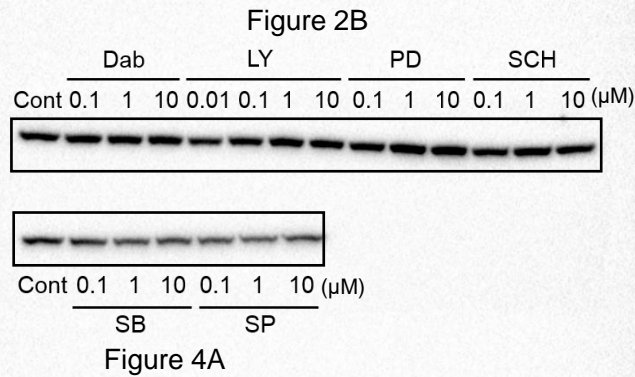

## pERK

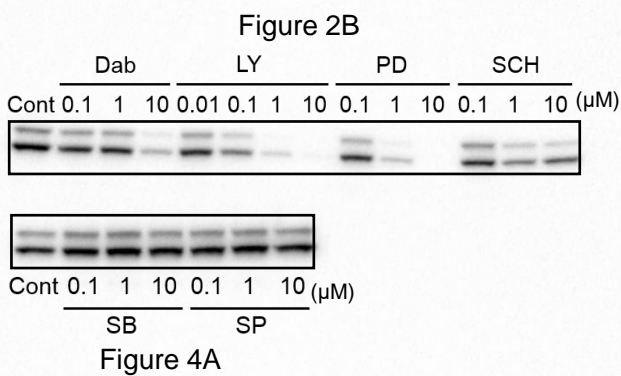

## tERK

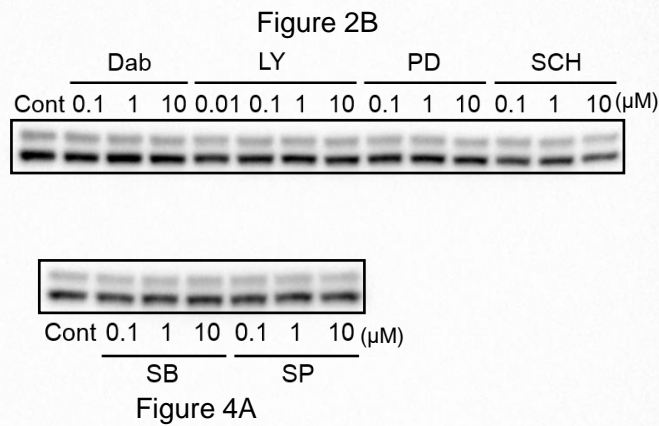

## pMEK

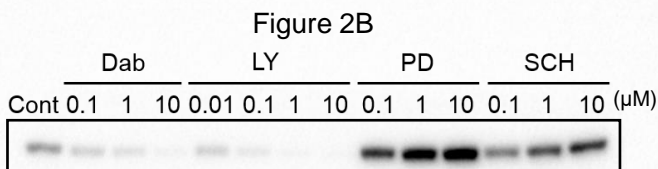

## tMEK

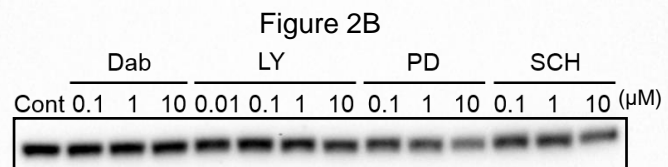

**Supplementary Figure S9.** Uncropped image of Western blots for Figure 2B and 4A. cUC cells (Sora) was treated with vehicle (dimethyl sulfoxide; Cont) and inhibitors of BRAF (Dabrafenib; Dab), pan-RAF (LY3009120; LY), MEK (PD0325901; PD), ERK (SCH772984; SCH), p38 (SB239063; SB) and JNK (SP600125; SP) for 12 h at indicated dose.

**A****TCCUB****COX2****Actin**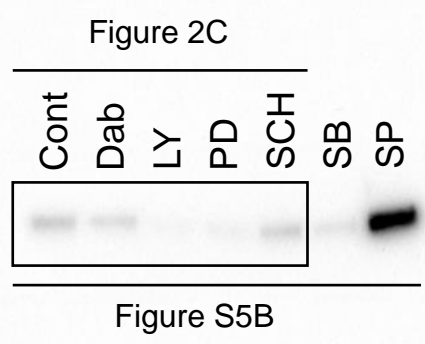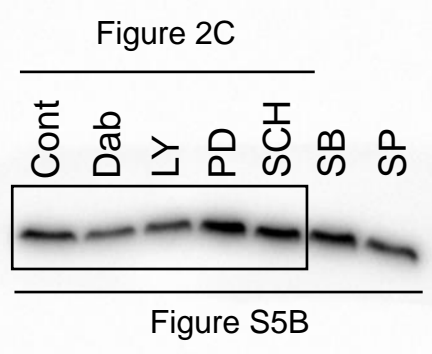**pMEK****tMEK**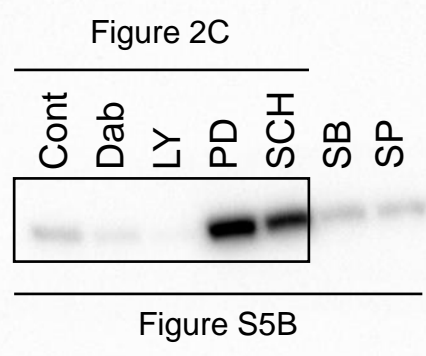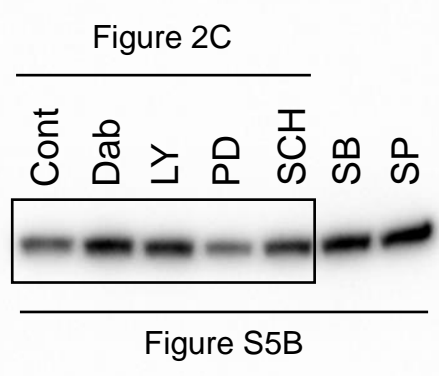**pERK****tERK**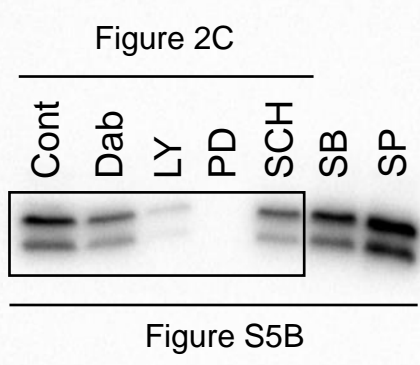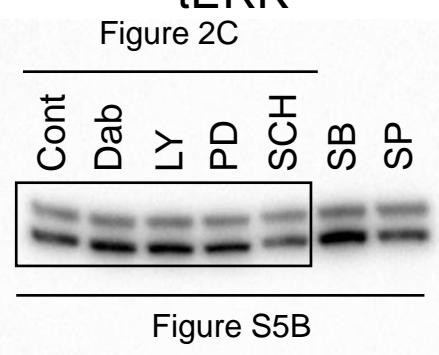

**B****LOVE****COX2****Actin**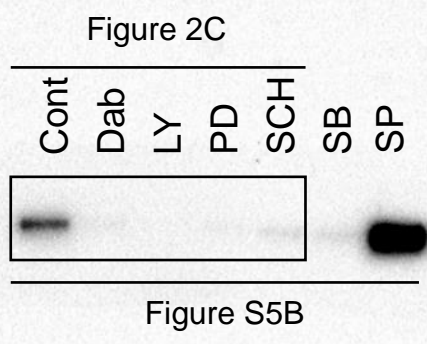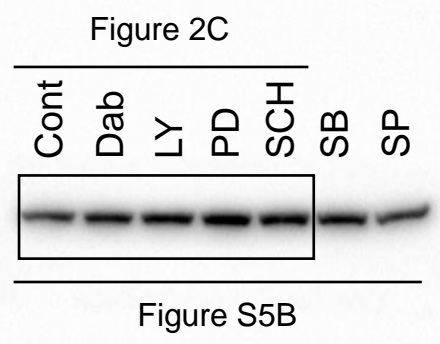**pMEK****tMEK**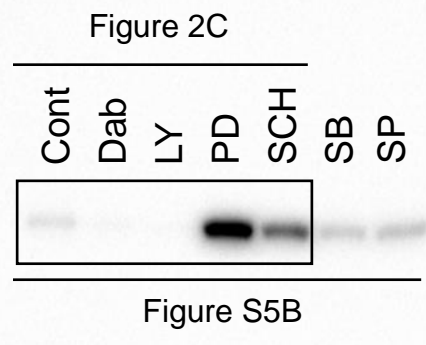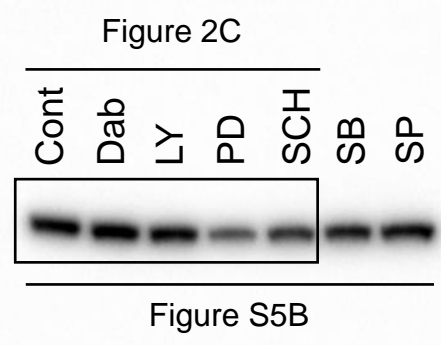**pERK****tERK**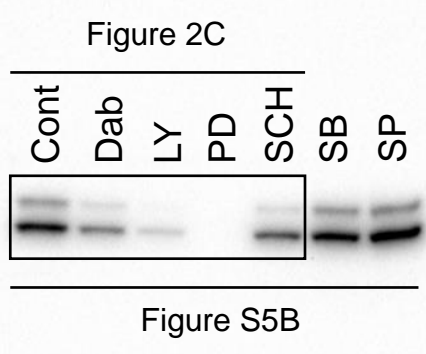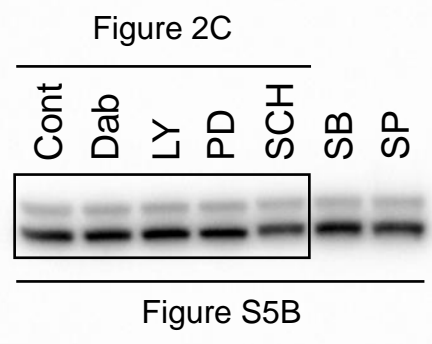

C

NENE

COX2

Actin

Figure 2C

Figure 2C

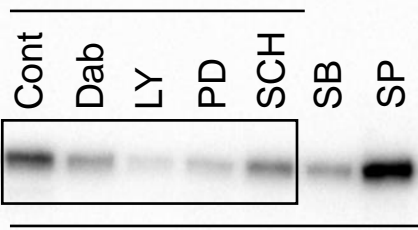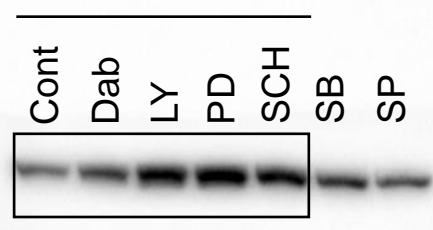

Figure S5B

Figure S5B

pMEK

tMEK

Figure 2C

Figure 2C

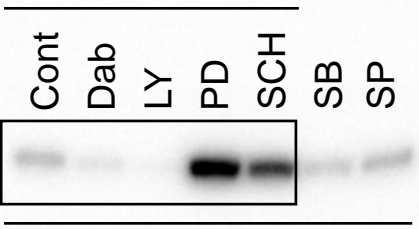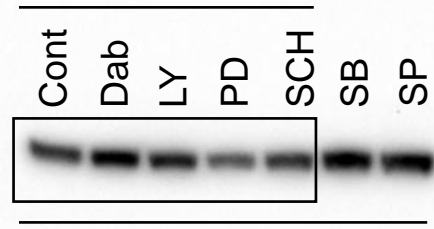

Figure S5B

Figure S5B

pERK

tERK

Figure 2C

Figure 2C

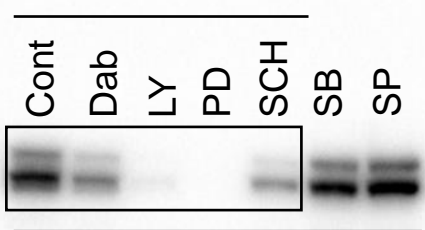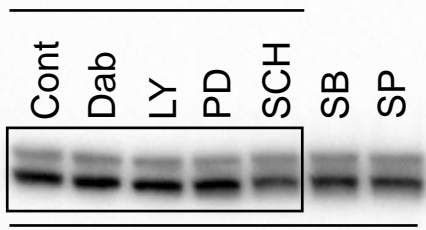

Figure S5B

Figure S5B

D

NMTCC

COX2

Figure 2C

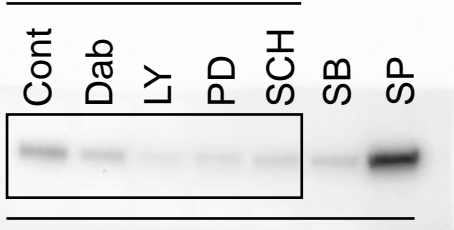

Figure S5B

Actin

Figure 2C

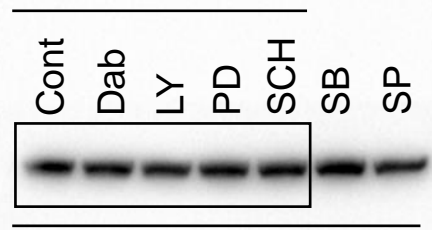

Figure S5B

pMEK

Figure 2C

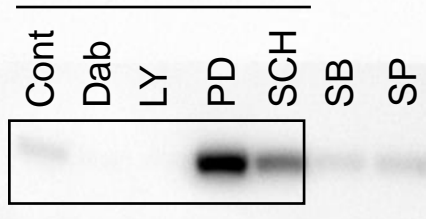

Figure S5B

tMEK

Figure 2C

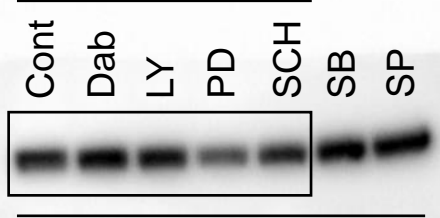

Figure S5B

pERK

Figure 2C

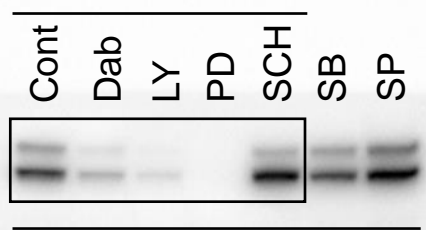

Figure S5B

tERK

Figure 2C

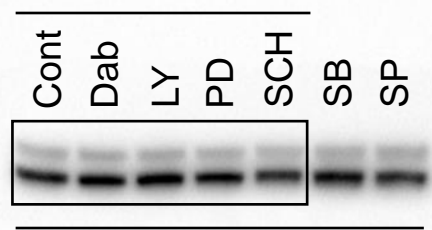

Figure S5B



**F****LTCC****COX2****Actin**

Figure 2C

Figure 2C

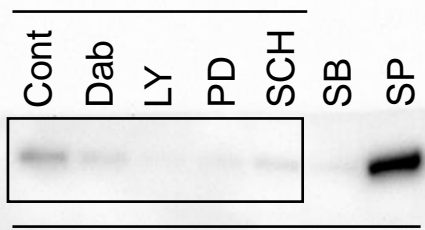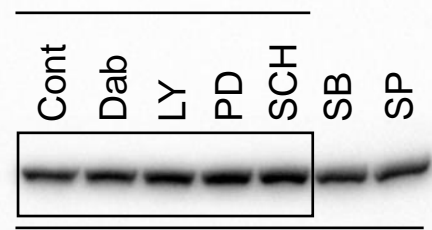

Figure S5B

Figure S5B

**pMEK****tMEK**

Figure 2C

Figure 2C

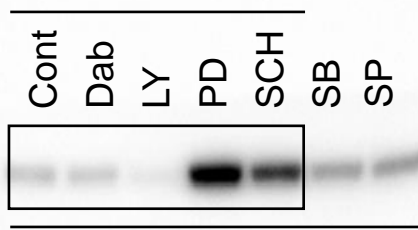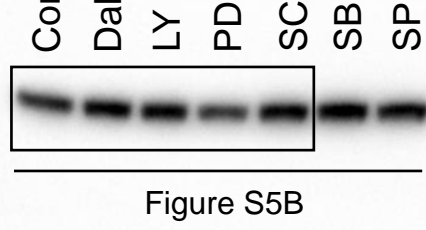

Figure S5B

Figure S5B

**pERK****tERK**

Figure 2C

Figure 2C

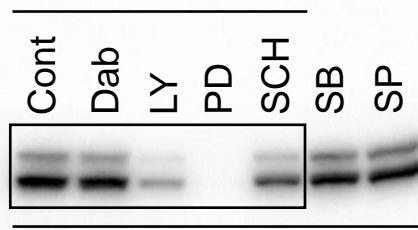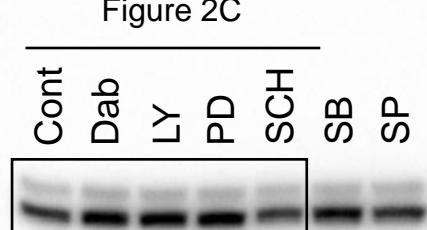

Figure S5B

Figure S5B

COX2

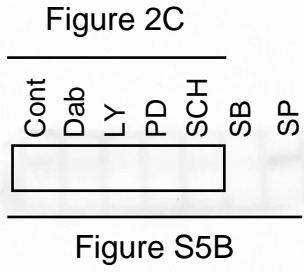

Actin

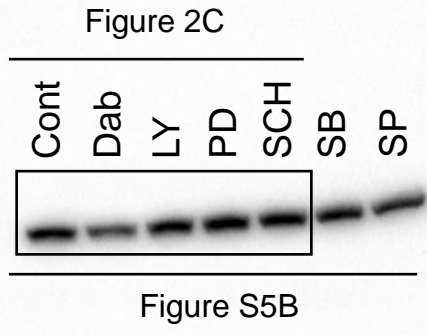

pMEK

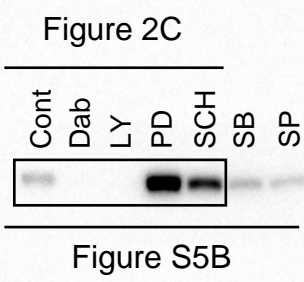

tMEK

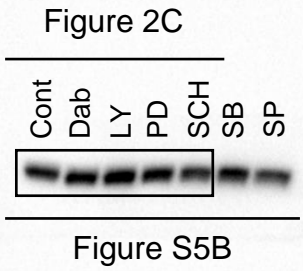

pERK

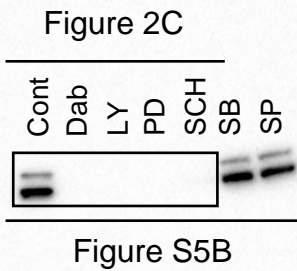

tERK

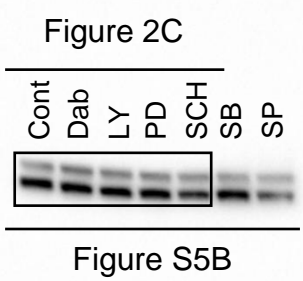

**G****COX2****OMTCC****Actin**

Figure 2C

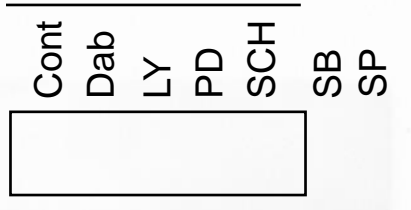

Figure S5B

Figure 2C

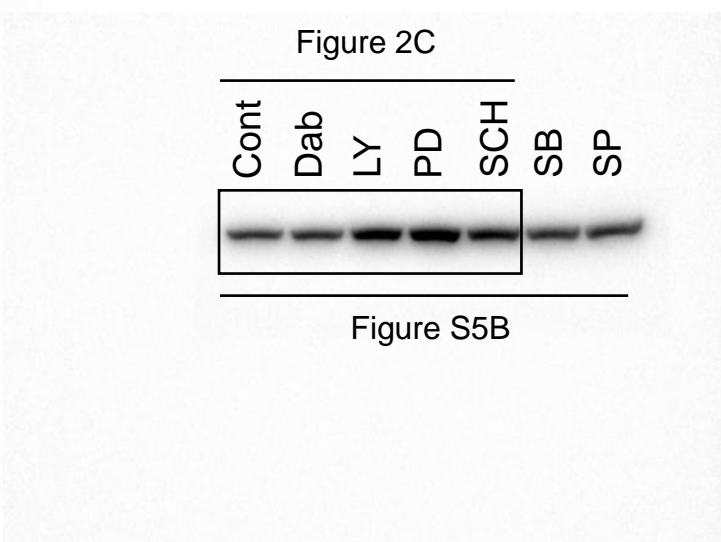

Figure S5B

**pMEK****tMEK**

Figure 2C

Figure 2C

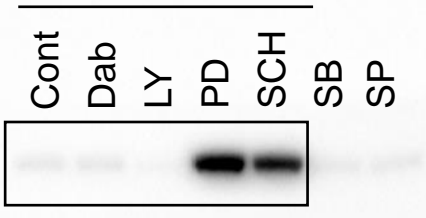

Figure S5B

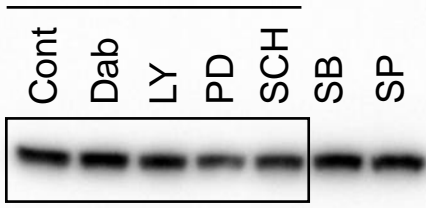

Figure S5B

**pERK****tERK**

Figure 2C

Figure 2C

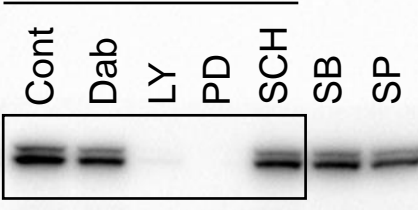

Figure S5B

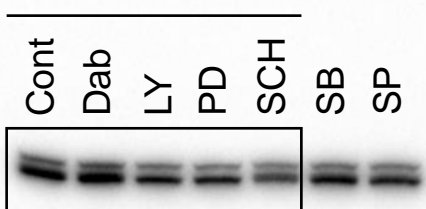

Figure S5B

**Supplementary Figure S10.** Uncropped image of Western blots for Figure 2C and Supplementary Figure S5B. cUC cells were treated with with vehicle (dimethyl sulfoxide; Cont) and inhibitors of BRAF (Dabrafenib; Dab) at 10  $\mu$ M, pan-RAF (LY3009120; LY) at 1  $\mu$ M, MEK (PD0325901; PD) at 10  $\mu$ M, ERK (SCH772984; SCH) at 10  $\mu$ M, p38 (SB239063; SB) at 10  $\mu$ M and JNK (SP600125; SP) at 10  $\mu$ M for 12 h.(A) TCCUB, (B) Love, (C) Nene, (D) NMTCC, (E) LTCC, (F) MCTCC and (G) OMTCC.

A

COX1

FBS

FBS+LY

pre 0h 6h 12h 24h 0h 6h 12h 24h

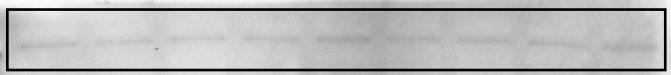

COX2

FBS

FBS+LY

pre 0h 6h 12h 24h 0h 6h 12h 24h

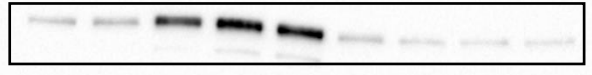

pERK

FBS

FBS+LY

pre 0h 6h 12h 24h 0h 6h 12h 24h

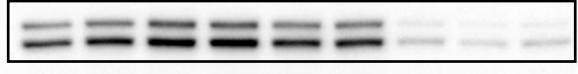

pp38

pre 0h 6h 12h 24h 0h 6h 12h 24h

FBS

FBS+LY

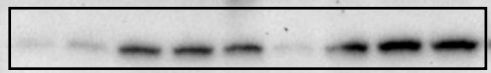

pJNK

FBS

FBS+LY

pre 0h 6h 12h 24h 0h 6h 12h 24h

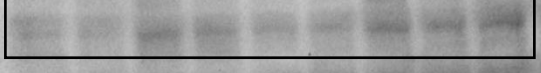

Actin

FBS

FBS+LY

pre 0h 6h 12h 24h 0h 6h 12h 24h

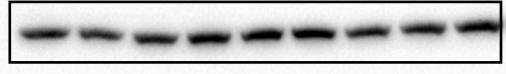

**B****COX1**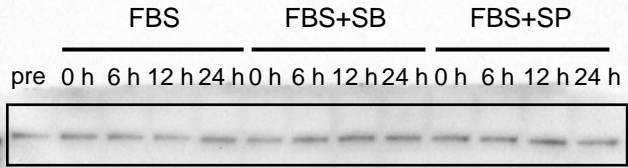**COX2**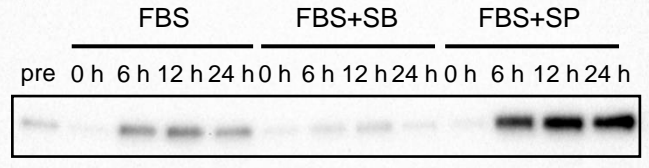**pERK**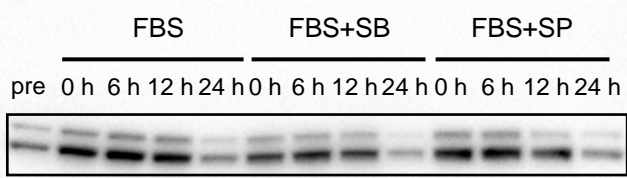**pp38**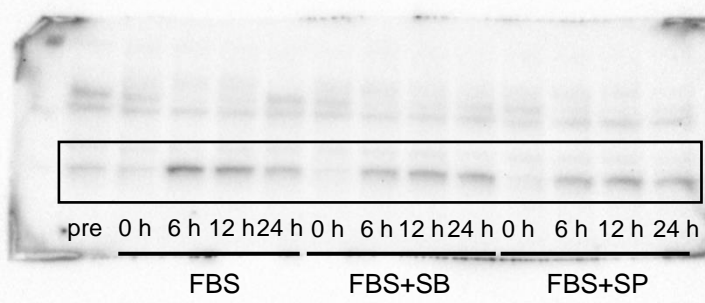**pJNK**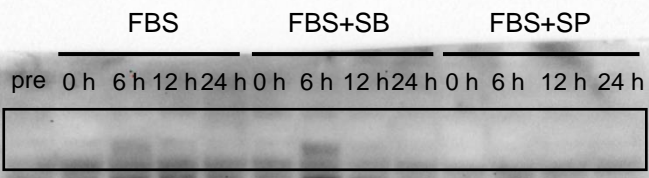**Actin**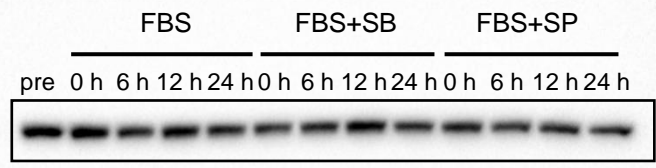

**Supplementary Figure S11.** Uncropped image of Western blots for Figure 4B. cUC cells (Sora) were treated with foetal bovine serum (FBS) and (A) LY3009120 (LY) at 1  $\mu$ M, (B) SB239063 (SB) or SP600125 (SP) after 24 h-starvation. Whole cell lysate was corrected before (pre) and after treatment for indicated time.

COX1

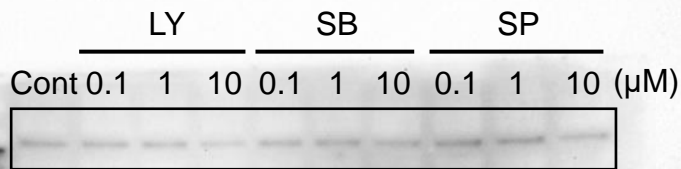

COX2

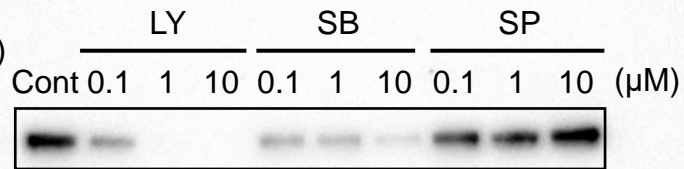

pERK

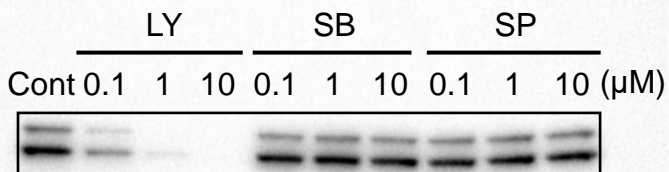

Actin

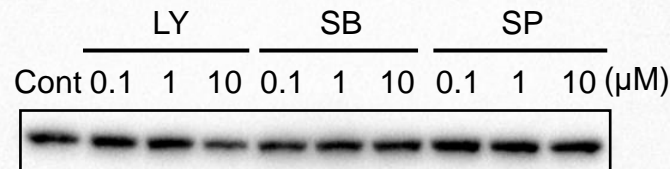

**Supplementary Figure S12.** Uncropped image of Western blots for Supplementary Figure S6. cUC cells (Sora) was treated with vehicle (dimethyl sulfoxide; Cont) and inhibitors of pan-RAF (LY3009120; LY), p38 (SB239063; SB) and JNK (SP600125; SP) for 12 h at indicated dose.
